# Supplementary material for: Computational biochemical investigation of the binding energy interactions between an estrogen receptor and its agonists
Source: Royal Society of Chemistry journal article supplement (doi:10.1039/c8nj03521k), 2018-01-01
Supplement: c8nj03521k1.pdf [file c8nj03521k1.pdf]

**Electronic Supplementary Information**  
**Computational biochemistry investigation to describe the binding energy interaction**  
**between an estrogen receptor and its agonists**

Aranthya H. Lima Costa<sup>a</sup>, Washington S. Clemente-Jr.<sup>a</sup>, Katyanna S. Bezerra<sup>a</sup>,  
José X. Lima Neto<sup>a</sup>, Eudenilson L. Albuquerque<sup>a</sup>, and Umberto L. Fulco<sup>a\*</sup>  
*Departamento de Biofísica e Farmacologia, Universidade Federal do Rio Grande do Norte, 59072-970, Natal-RN, Brazil*

---

\* Corresponding author, e-mail: umbertofulco@gmail.com; Tel: +-55-84-32153793; Fax: +-55-84-32153791

TABLE S1. Individual region binding energies of  $17\beta$ -estradiol and diethylstilbestrol. Table is organized from the strongest interaction ( $> 10 \text{ kcal mol}^{-1}$ ) to the weakest one ( $< 5 \text{ kcal mol}^{-1}$ ).

| Interaction strength<br>( $\text{kcal mol}^{-1}$ ) | Protein region and total energy ( $\text{kcal mol}^{-1}$ ) |                    |
|----------------------------------------------------|------------------------------------------------------------|--------------------|
|                                                    | $17\beta$ -estradiol                                       | Diethylstilbestrol |
| $> 10$                                             | H3 (-28.61)                                                | H3 (-24.98)        |
|                                                    | H11 (-10.74)                                               | H11 (-13.91)       |
| $5 - 10$                                           | S1 (-6.31)                                                 | H6 (-7.66)         |
|                                                    | H5 (-5.80)                                                 | H8 (-5.94)         |
|                                                    | H8 (-5.48)                                                 | –                  |
|                                                    | –                                                          | –                  |
| $< 5$                                              | H6 (-4.48)                                                 | S1 (-4.81)         |
|                                                    | H7 (-1.23)                                                 | H7 (-3.20)         |
|                                                    | L7 (-0.84)                                                 | H5 (-1.86)         |
|                                                    | H9 (-0.35)                                                 | L2 (-0.79)         |
|                                                    | S2 (-0.10)                                                 | L7 (-0.19)         |
|                                                    | H12 (0.03)                                                 | H9 (-0.14)         |
|                                                    | L11 (0.04)                                                 | H2 (0.00)          |
|                                                    | L2 (0.52)                                                  | S2 (0.08)          |
|                                                    | H2 (0.68)                                                  | L11 (0.08)         |
|                                                    | L6 (6.07)                                                  | L6 (0.33)          |
|                                                    | –                                                          | H12 (2.87)         |

TABLE S2. Description of the 120 ER $\sigma$  residues interacting with E2. We also shown the functional groups and distances of the ligand to each amino-acid in the binding pocket radius ranging from 2.0 to 12.5 Å.

| residue | Atomic Group             | Distance (Å)     | Radius (Å) | Energy (kcal mol <sup>-1</sup> ) | residue | Atomic Group         | Distance (Å) | Radius (Å) | Energy (kcal mol <sup>-1</sup> ) |
|---------|--------------------------|------------------|------------|----------------------------------|---------|----------------------|--------------|------------|----------------------------------|
| GLU353  | i(C3)OH                  | 1.96             | 2.0        | -14.65                           | THR431  | ii(C6)H              | 8.81         | 9.0        | -0.06                            |
| PHE404  | i(C2)H; i(ring); ii(C9)H | 2.76; 4.91; 2.28 | 2.5        | -6.24                            | VAL534  | ii(C12)H; iii(C17)OH | 6.46; 6.85   | 6.5        | -0.05                            |
| LEU346  | i(C1)H; ii(C11)H         | 2.84; 2.13       | 2.5        | -6.13                            | ASN519  | iii(C16)H            | 7.36         | 7.5        | -0.05                            |
| HIS524  | iii(C17)OH               | 2.07             | 2.5        | -4.57                            | LEU544  | iii(C18)H            | 6.35         | 6.5        | -0.04                            |
| LEU391  | i(C4)H; i(ring); ii(C6)H | 1.94; 4.81; 2.45 | 2.0        | -4.43                            | HIS513  | ii(C7)H              | 9.93         | 10.0       | -0.04                            |
| MET388  | ii(C6)H; iii(C7)H        | 2.26; 2.21       | 2.5        | -3.94                            | LEU536  | iii(C18)H            | 6.53         | 7.0        | -0.03                            |
| MET343  | ii(C12)H; iii(C17)OH     | 2.31; 2.59       | 2.5        | -3.90                            | SER341  | ii(C12)H             | 9.46         | 9.5        | -0.03                            |
| LEU525  | iii(C18)H                | 2.54             | 3.0        | -3.43                            | ILE452  | ii(C6)H              | 9.96         | 10.0       | -0.03                            |
| LEU384  | ii(C8)H; iii(C15)H       | 2.24; 2.71       | 2.5        | -3.35                            | ALA340  | iii(C17)OH           | 9.57         | 10.0       | -0.02                            |
| MET421  | iii(C17)H                | 2.05             | 2.5        | -1.98                            | TYR526  | iii(C17)OH           | 6.47         | 6.5        | -0.01                            |
| LEU387  | i(C4)H; i(ring)          | 2.46; 3.29       | 2.5        | -1.75                            | ILE514  | ii(C6)H              | 7.46         | 7.5        | -0.01                            |
| THR347  | ii(C12)H                 | 3.19             | 3.5        | -1.70                            | VAL533  | iii(C17)OH           | 7.63         | 8.0        | -0.01                            |
| ALA350  | i(C1)H; i(ring)          | 2.88; 5.15       | 3.0        | -1.67                            | ASN407  | i(C3)OH              | 10.07        | 10.5       | -0.01                            |
| ILE424  | iii(C15)H                | 2.38             | 2.5        | -1.63                            | ASN532  | iii(C17)OH           | 11.61        | 12.0       | -0.01                            |
| LEU428  | ii(C7)H                  | 2.58             | 3.0        | -1.63                            | GLY420  | iii(C16)H            | 5.97         | 6.0        | -0.0002                          |
| GLY521  | iii(C16)H                | 2.35             | 2.5        | -1.39                            | LEU429  | iii(C15)H            | 8.29         | 9.0        | 0.00                             |
| ASP351  | i(C2)H; ii(C11)H         | 6.15; 6.59       | 6.5        | -1.35                            | SER338  | ii(C12)H             | 11.07        | 11.5       | 0.01                             |
| GLU330  | i(C2)H                   | 9.23             | 9.5        | -0.82                            | TRP360  | i(C3)OH              | 11.95        | 12.0       | 0.01                             |
| GLY390  | i(C4)H                   | 4.98             | 5.0        | -0.81                            | CYS381  | ii(C6)H              | 11.54        | 12.0       | 0.01                             |
| GLU339  | iii(C17)OH               | 8.10             | 8.5        | -0.73                            | LEU379  | iii(C18)H            | 12.01        | 12.5       | 0.01                             |
| LEU349  | i(C2)H                   | 2.53             | 3.0        | -0.68                            | SER329  | i(C2)H               | 6.57         | 7.0        | 0.02                             |
| GLU419  | iii(C17)OH               | 6.92             | 7.0        | -0.65                            | HIS398  | i(C3)OH              | 12.08        | 12.5       | 0.02                             |
| LYS401  | ii(C7)H                  | 10.41            | 10.5       | -0.62                            | ILE510  | i(C2)H               | 12.25        | 12.5       | 0.02                             |
| LEU402  | ii(C7)H                  | 4.78             | 5.0        | -0.50                            | SER527  | iii(C17)OH           | 6.73         | 7.0        | 0.03                             |
| MET528  | iii(C17)OH               | 3.39             | 3.5        | -0.50                            | CYS530  | iii(C17)OH           | 9.60         | 10.0       | 0.03                             |
| TRP383  | iii(C18)H                | 4.18             | 4.5        | -0.44                            | TYR331  | i(C2)H               | 10.64        | 11.0       | 0.03                             |
| PHE435  | i(C4)H                   | 10.08            | 10.5       | -0.42                            | VAL422  | iii(C16)H            | 7.39         | 7.5        | 0.04                             |
| GLU523  | iii(C16)H                | 6.17             | 6.5        | -0.39                            | PHE445  | i(C4)H               | 8.62         | 9.0        | 0.04                             |
| LEU345  | i(C1)H; ii(C11)H         | 5.69; 6.00       | 6.0        | -0.37                            | LEU541  | iii(C18)H            | 9.96         | 10.0       | 0.04                             |
| LYS449  | i(C4)H                   | 8.77             | 9.0        | -0.36                            | ILE386  | i(C4)H; ii(C6)H      | 5.74; 6.22   | 6.0        | 0.05                             |
| ASN348  | i(C2)H; ii(C11)H         | 6.68; 6.30       | 6.5        | -0.33                            | LYS529  | iii(C18)H            | 7.38         | 7.5        | 0.05                             |
| MET522  | iii(C16)H                | 4.56             | 5.0        | -0.33                            | ALA382  | ii(C6)H              | 8.70         | 9.0        | 0.05                             |
| ARG515  | iii(C15)H                | 9.37             | 9.5        | -0.25                            | GLU380  | iii(C18)H            | 11.34        | 11.5       | 0.05                             |
| MET517  | ii(C7)H; iii(C15)H       | 5.64; 5.03       | 5.5        | -0.23                            | ILE358  | i(C3)OH              | 12.01        | 12.5       | 0.05                             |
| LYS520  | iii(C16)H                | 4.80             | 5.0        | -0.22                            | MET357  | ii(C6)H              | 7.51         | 8.0        | 0.07                             |
| MET342  | ii(C12)H                 | 5.99             | 6.0        | -0.22                            | PRO324  | i(C3)OH              | 8.32         | 8.5        | 0.07                             |
| GLY415  | iii(C17)H                | 7.72             | 8.0        | -0.21                            | SER432  | ii(C6)H              | 9.26         | 9.5        | 0.08                             |
| TRP393  | i(C4)H                   | 7.31             | 7.5        | -0.20                            | PRO406  | i(C3)OH              | 7.83         | 8.0        | 0.09                             |
| SER395  | i(C4)H                   | 6.89             | 7.0        | -0.19                            | VAL355  | i(C2)H               | 9.88         | 10.0       | 0.11                             |
| SER518  | ii(C7)H; iii(C15)H       | 5.92; 5.07       | 5.5        | -0.18                            | CYS417  | iii(C17)OH           | 9.83         | 10.0       | 0.11                             |
| VAL418  | iii(C17)OH               | 4.53             | 5.0        | -0.18                            | LYS416  | iii(C17)H            | 10.25        | 10.5       | 0.11                             |
| LEU539  | ii(C11)H                 | 11.27            | 11.5       | -0.17                            | ASP545  | iii(C18)H            | 11.48        | 11.5       | 0.11                             |
| ARG412  | ii(C7)H                  | 10.60            | 11.0       | -0.16                            | LEU408  | i(C2)H               | 5.80         | 6.0        | 0.12                             |
| LEU540  | iii(C18)H                | 4.94             | 5.0        | -0.15                            | ILE326  | i(C3)OH              | 6.61         | 7.0        | 0.14                             |
| PHE425  | iii(C14)H                | 4.45             | 4.5        | -0.14                            | GLU423  | iii(C16)H            | 7.65         | 8.0        | 0.14                             |
| PRO325  | i(C3)OH                  | 7.86             | 8.0        | -0.14                            | HIS356  | i(C3)OH              | 8.89         | 9.0        | 0.14                             |
| LEU410  | ii(C9)H                  | 6.46             | 6.5        | -0.13                            | SER537  | ii(C12)H             | 10.17        | 10.5       | 0.15                             |
| LEU354  | ii(C11)H                 | 6.37             | 6.5        | -0.13                            | MET543  | iii(C18)H            | 9.19         | 9.5        | 0.18                             |
| PHE337  | ii(C12)H                 | 9.41             | 9.5        | -0.13                            | HIS547  | iii(C18)H            | 10.09        | 10.5       | 0.19                             |
| MET427  | iii(C15)H                | 6.82             | 7.0        | -0.12                            | ALA405  | i(C3)OH              | 6.03         | 6.5        | 0.20                             |
| GLY344  | ii(C12)H                 | 7.40             | 7.5        | -0.12                            | LEU403  | i(C3)OH              | 5.56         | 6.0        | 0.21                             |
| HIS516  | iii(C15)H                | 8.41             | 8.5        | -0.10                            | LEU327  | i(C3)OH              | 6.09         | 6.5        | 0.25                             |
| LEU409  | i(C3)OH                  | 9.72             | 10.0       | -0.10                            | GLU323  | i(C3)OH              | 11.03        | 11.5       | 0.31                             |
| GLN414  | iii(C17)OH               | 9.87             | 10.0       | -0.10                            | ASP426  | iii(C15)H            | 8.29         | 8.5        | 0.32                             |
| ILE389  | i(C4)H; ii(C6)H          | 5.45; 5.54       | 5.5        | -0.08                            | GLU385  | i(C4)H; ii(C6)H      | 6.83; 6.21   | 6.5        | 0.43                             |
| MET396  | i(C4)H                   | 10.58            | 11.0       | -0.08                            | LYS531  | iii(C17)OH           | 8.73         | 9.0        | 0.80                             |
| ALA430  | ii(C7)H                  | 11.06            | 11.5       | -0.08                            | TYR328  | i(C2)H               | 8.05         | 8.5        | 0.68                             |
| GLU542  | iii(C18)H                | 12.22            | 12.5       | -0.08                            | ARG352  | i(C2)H               | 6.99         | 7.0        | 3.22                             |
| PRO535  | ii(C12)H                 | 9.88             | 10.0       | -0.07                            | ARG394  | i(C3)OH              | 2.03         | 2.5        | 5.31                             |
| VAL392  | i(C4)H                   | 4.90             | 5.0        | -0.06                            | ASP411  | ii(C7)H              | 10.98        | 11.0       | 6.60                             |

TABLE S3. Description of the 128 ER $\alpha$  residues interacting with DES. We also shown the functional groups and distances of the ligand to each amino-acid in the binding pocket radius ranging from 2.0 to 12.5 Å.

| residue | Atomic Group                    | Distance (Å)     | Radius (Å) | Energy (kcal mol <sup>-1</sup> ) | residue | Atomic Group     | Distance (Å) | Radius (Å) | Energy (kcal mol <sup>-1</sup> ) |
|---------|---------------------------------|------------------|------------|----------------------------------|---------|------------------|--------------|------------|----------------------------------|
| GLU353  | i(C3)OH                         | 1.73             | 2.0        | -15.04                           | SER329  | i(C4)H           | 8.95         | 9.0        | -0.05                            |
| LEU346  | ii(C8)H; iii(CP5)H              | 2.24; 2.71       | 3.0        | -5.12                            | HIS513  | ii(C9)H          | 10.12        | 10.5       | -0.05                            |
| PHE404  | i(C6)H; i(ring); ii(C8)H        | 2.88; 5.39; 2.31 | 2.5        | -4.54                            | GLU380  | ii(CP8)H         | 10.53        | 11.0       | -0.05                            |
| LEU525  | ii(CP9)H; iii(ring); iii(CP3)OH | 2.93; 4.35; 2.27 | 2.5        | -4.56                            | ALA430  | ii(C9)H          | 10.16        | 11.5       | -0.05                            |
| MET388  | i(C2)H; i(ring); ii(C9)H        | 2.67; 5.95; 2.31 | 2.5        | -3.65                            | LEU429  | ii(C9)H          | 7.70         | 8.0        | -0.04                            |
| LEU391  | i(C2)H; i(ring); ii(C9)H        | 2.60; 4.99; 2.85 | 3.0        | -3.59                            | LEU403  | i(C3)OH          | 8.03         | 8.5        | -0.04                            |
| HIS524  | iii(CP2)H                       | 2.39             | 2.5        | -3.27                            | ILE452  | i(C2)H           | 9.69         | 10.0       | -0.04                            |
| ASP351  | ii(CP9)H                        | 5.23             | 5.5        | -2.92                            | CYS530  | iii(CP3)OH       | 8.45         | 8.5        | -0.03                            |
| MET421  | iii(CP4)H; iii(ring)            | 2.88; 3.03       | 3.0        | -2.74                            | ASN413  | ii(C9)H          | 12.10        | 12.5       | -0.03                            |
| THR347  | ii(CP8)H                        | 2.87             | 3.0        | -2.73                            | LYS529  | iii(CP3)OH       | 5.98         | 6.0        | -0.02                            |
| LEU384  | i(C1)H; i(ring); ii(CP8)H       | 2.76; 5.72; 2.16 | 2.5        | -2.62                            | ALA340  | iii(CP4)H        | 8.80         | 9.0        | -0.02                            |
| MET343  | iii(CP4)H; iii(ring)            | 2.29; 5.99       | 2.5        | -2.60                            | GLN414  | ii(C8)H          | 10.17        | 10.5       | -0.02                            |
| LYS416  | ii(C9)H                         | 10.58            | 11.0       | -2.56                            | LEU690  | ii(CP9)H         | 11.31        | 11.5       | -0.02                            |
| GLY521  | iii(CP2)H                       | 2.37             | 2.5        | -2.28                            | LEU453  | i(C3)OH          | 12.07        | 12.5       | -0.02                            |
| MET528  | iii(CP3)OH                      | 2.65             | 3.0        | -1.70                            | SER338  | iii(CP4)H        | 10.60        | 11.0       | -0.01                            |
| ILE424  | ii(C9)H                         | 2.56             | 3.0        | -1.53                            | GLY400  | ii(C9)H          | 12.94        | 12.5       | -0.01                            |
| ALA350  | i(C5)H; i(ring); ii(CP9)H       | 2.49; 4.82; 2.27 | 2.5        | -1.43                            | LYS520  | iii(CP2)H        | 4.87         | 5.0        | -0.004                           |
| TRP383  | ii(CP9)H                        | 2.70             | 3.0        | -1.14                            | MET543  | ii(CP9)H         | 6.87         | 7.0        | 0.00                             |
| LEU540  | ii(CP9)H                        | 2.33             | 2.5        | -1.04                            | PHE337  | ii(C8)H          | 11.34        | 11.5       | 0.00                             |
| LEU428  | ii(C9)H                         | 2.14             | 2.5        | -0.88                            | ALA546  | ii(CP9)H         | 11.37        | 11.5       | 0.00                             |
| PHE425  | ii(C9)H                         | 3.30             | 3.5        | -0.85                            | TYR331  | i(C5)H           | 11.67        | 12.0       | 0.00                             |
| MET522  | iii(CP2)H                       | 4.41             | 4.5        | -0.84                            | VAL534  | iii(CP4)H        | 6.20         | 6.5        | 0.01                             |
| GLU330  | i(C4)H                          | 10.42            | 10.5       | -0.73                            | MET396  | i(C2)H           | 11.36        | 11.5       | 0.01                             |
| SER432  | ii(C9)H                         | 9.91             | 10.0       | -0.70                            | ASN407  | i(C4)H           | 11.92        | 12.0       | 0.02                             |
| GLY390  | i(C2)H                          | 4.99             | 5.0        | -0.68                            | LEU408  | ii(C8)H          | 7.07         | 7.5        | 0.03                             |
| LEU345  | i(C5)H                          | 6.30             | 6.5        | -0.51                            | ILE514  | ii(C9)H          | 7.83         | 8.0        | 0.03                             |
| LYS401  | ii(C9)H                         | 10.47            | 10.5       | -0.42                            | ILE510  | i(C2)H           | 12.46        | 12.5       | 0.03                             |
| ARG412  | ii(C9)H                         | 9.16             | 9.5        | -0.39                            | MET357  | i(C3)OH          | 6.12         | 6.5        | 0.04                             |
| MET342  | iii(CP5)H                       | 6.30             | 6.5        | -0.36                            | LEU541  | ii(CP9)H         | 8.28         | 8.5        | 0.04                             |
| ASP538  | ii(CP9)H                        | 10.87            | 11.0       | -0.34                            | TRP360  | i(C3)OH          | 10.31        | 10.5       | 0.04                             |
| MET517  | ii(C9)H                         | 5.54             | 6.0        | -0.32                            | LEU379  | ii(CP9)H         | 10.96        | 11.0       | 0.04                             |
| LEU402  | ii(C9)H                         | 4.45             | 4.5        | -0.30                            | LEU511  | i(C2)H           | 11.98        | 12.0       | 0.04                             |
| ARG515  | iii(CP1)H                       | 10.19            | 10.5       | -0.30                            | PRO324  | i(C3)OH          | 8.57         | 9.0        | 0.06                             |
| LEU354  | ii(CP9)H                        | 4.29             | 4.5        | -0.29                            | ILE326  | i(C3)OH          | 8.36         | 8.5        | 0.07                             |
| VAL418  | iii(CP3)OH                      | 4.93             | 5.0        | -0.28                            | ALA405  | i(C3)OH          | 8.01         | 8.5        | 0.07                             |
| ILE386  | i(C2)H                          | 5.35             | 5.5        | -0.28                            | PHE445  | i(C3)OH          | 9.00         | 9.5        | 0.07                             |
| SER518  | iii(CP1)H                       | 5.60             | 6.0        | -0.27                            | PRO406  | i(C3)OH          | 9.88         | 10.0       | 0.09                             |
| GLY344  | iii(CP4)H                       | 6.81             | 7.0        | -0.26                            | ILE358  | i(C3)OH          | 10.21        | 10.5       | 0.09                             |
| MET427  | ii(C9)H                         | 7.11             | 7.5        | -0.23                            | CYS381  | ii(CP8)H         | 10.60        | 11.0       | 0.09                             |
| TYR328  | i(C4)H                          | 9.58             | 10.0       | -0.23                            | VAL422  | ii(C9)H          | 7.69         | 8.0        | 0.10                             |
| LEU536  | iii(CP4)H                       | 4.87             | 5.0        | -0.20                            | GLU323  | i(C3)OH          | 11.67        | 12.0       | 0.10                             |
| HIS516  | iii(CP1)H                       | 9.23             | 9.5        | -0.18                            | TYR526  | iii(CP3)OH       | 5.17         | 5.5        | 0.11                             |
| GLU542  | ii(CP9)H                        | 10.24            | 10.5       | -0.18                            | ASP545  | ii(CP9)H         | 10.54        | 11.0       | 0.11                             |
| GLY420  | iii(CP3)OH                      | 7.06             | 7.5        | -0.17                            | ASN359  | i(C3)OH          | 12.69        | 12.5       | 0.11                             |
| ILE389  | i(C2)H                          | 5.09             | 5.5        | -0.15                            | ALA382  | i(C2)H           | 8.79         | 9.0        | 0.14                             |
| VAL392  | i(C2)H                          | 5.32             | 5.5        | -0.15                            | VAL355  | i(C3)OH          | 8.89         | 9.0        | 0.14                             |
| GLY415  | ii(C9)H                         | 7.88             | 8.0        | -0.15                            | LEU327  | i(C3)OH          | 6.26         | 6.5        | 0.19                             |
| LYS449  | i(C3)OH                         | 8.62             | 9.0        | -0.15                            | HIS356  | i(C3)OH          | 8.20         | 8.5        | 0.19                             |
| LYS531  | iii(CP3)OH                      | 8.22             | 8.5        | -0.14                            | SER527  | iii(CP3)OH       | 4.72         | 5.0        | 0.20                             |
| PRO325  | i(C3)OH                         | 8.76             | 9.0        | -0.14                            | GLU419  | iii(CP3)OH       | 6.20         | 6.5        | 0.27                             |
| LEU544  | ii(CP8)H                        | 6.66             | 7.0        | -0.13                            | ASN348  | ii(CP9)H         | 6.01         | 6.5        | 0.31                             |
| SER341  | iii(CP5)H                       | 9.81             | 9.5        | -0.13                            | SER537  | ii(CP9)H         | 6.79         | 7.0        | 0.31                             |
| THR431  | ii(C9)H                         | 9.15             | 9.5        | -0.12                            | LEU539  | ii(CP9)H         | 8.63         | 9.0        | 0.37                             |
| ASN519  | iii(CP2)H                       | 7.40             | 7.5        | -0.11                            | HIS547  | ii(CP8)H         | 8.49         | 8.5        | 0.39                             |
| CYS417  | iii(CP4)H                       | 10.25            | 10.5       | -0.11                            | GLU423  | ii(C9)H          | 7.64         | 8.0        | 0.57                             |
| SER395  | i(C2)H                          | 7.87             | 8.0        | -0.10                            | ASP411  | ii(C9)H          | 9.76         | 10.0       | 0.64                             |
| VAL533  | iii(CP4)H                       | 7.73             | 8.0        | -0.10                            | ASP426  | ii(C9)H          | 7.49         | 7.5        | 0.68                             |
| ASN532  | iii(CP3)OH                      | 9.44             | 9.5        | -0.06                            | ARG394  | i(C3)OH          | 3.48         | 3.5        | 0.70                             |
| PRO535  | iii(CP4)H                       | 9.58             | 10.0       | -0.06                            | GLU339  | iii(CP4)H        | 7.84         | 8.0        | 0.71                             |
| PHE435  | i(C2)H                          | 10.25            | 10.5       | -0.06                            | LEU349  | i(C4)H           | 3.84         | 4.0        | 0.73                             |
| LEU409  | ii(C8)H                         | 10.78            | 11.0       | -0.06                            | GLU385  | i(C2)H           | 6.10         | 6.5        | 0.87                             |
| GLU523  | iii(CP3)OH                      | 5.44             | 5.5        | -0.05                            | LEU387  | i(C3)OH; i(ring) | 2.29; 4.67   | 2.5        | 1.09                             |
| LEU410  | ii(C8)H                         | 6.18             | 6.5        | -0.05                            | ARG548  | iii(CP2)H        | 8.47         | 8.5        | 3.64                             |
| TRP393  | i(C2)H                          | 7.68             | 8.0        | -0.05                            | ARG352  | i(C4)H           | 6.82         | 7.0        | 4.07                             |
